# Supplementary material for: Genome-Wide Analysis of Transcriptional Reprogramming in Mouse Models of Acute Myeloid Leukaemia
Source: PubMed Central journal article supplement (PMC3030562; doi:10.1371/journal.pone.0016330), 2011-01-28
Supplement: pone.0016330.s001.pdf [file pone.0016330.s001.pdf]

A

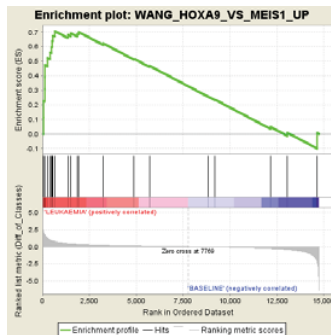

| GENE_SYMBOL | GENE_TITLE                                                                         |
|-------------|------------------------------------------------------------------------------------|
| MTUS1       | mitochondrial tumor suppressor 1                                                   |
| CSF2RA      | colony stimulating factor 2 receptor, alpha, low-affinity (granulocyte-macrophage) |
| RHOJ        | ras homolog gene family, member J                                                  |
| ELA2        | elastase 2, neutrophil                                                             |
| SORT1       | sortilin 1                                                                         |
| PDE2A       | phosphodiesterase 2A, cGMP-stimulated                                              |
| PRTN3       | proteinase 3 (serine proteinase, neutrophil, Wegener granulomatosis autoantigen)   |
| TLR4        | toll-like receptor 4                                                               |
| IGSF6       | immunoglobulin superfamily, member 6                                               |
| CD177       | CD177 molecule                                                                     |
| ALAS1       | aminolevulinatase, delta-, synthase 1                                              |

B

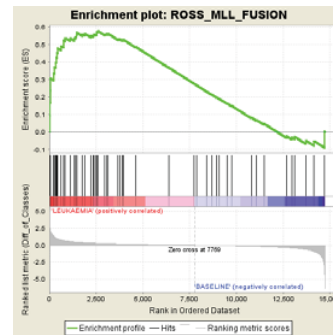

| GENE_SYMBOL | GENE_TITLE                                                            |
|-------------|-----------------------------------------------------------------------|
| ALDH3B1     | aldehyde dehydrogenase 3 family, member B1                            |
| HOXA5       | homeobox A5                                                           |
| HOXA9       | homeobox A9                                                           |
| SIRPA       | signal-regulatory protein alpha                                       |
| GAS7        | growth arrest-specific 7                                              |
| RNPEP       | arginyl aminopeptidase (aminopeptidase B)                             |
| HK3         | hexokinase 3 (white cell)                                             |
| MFSD1       | major facilitator superfamily domain containing 1                     |
| APOC2       | apolipoprotein C-II                                                   |
| LY86        | lymphocyte antigen 86                                                 |
| ANXA5       | annexin A5                                                            |
| TDRD7       | tudor domain containing 7                                             |
| CCL5        | chemokine (C-C motif) ligand 5                                        |
| MBNL1       | muscleblind-like (Drosophila)                                         |
| APH1B       | anterior pharynx defective 1 homolog B (C. elegans)                   |
| FBP1        | fructose-1,6-bisphosphatase 1                                         |
| ALDH3A2     | aldehyde dehydrogenase 3 family, member A2                            |
| FES         | feline sarcoma oncogene                                               |
| SPG21       | spastic paraplegia 21, maspardin (autosomal recessive, Mast syndrome) |
| LRMP        | lymphoid-restricted membrane protein                                  |
| GGA2        | golgi associated, gamma adaptin ear containing, ARF binding protein 2 |
| PPP1        | tripeptidyl peptidase I                                               |
| AK2         | adenylate kinase 2                                                    |
| CAPG        | capping protein (actin filament), gelsolin-like                       |
| PYCARD      | PYD and CARD domain containing                                        |
| CPM         | carboxypeptidase M                                                    |
| PBX3        | pre-B-cell leukemia transcription factor 3                            |
| MRPL33      | mitochondrial ribosomal protein L33                                   |

C

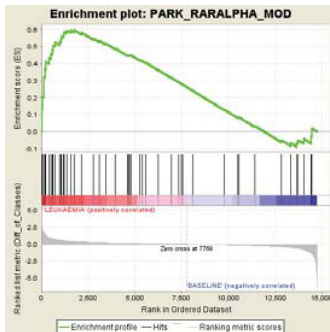

| GENE_SYMBOL | GENE_TITLE                                                                        |
|-------------|-----------------------------------------------------------------------------------|
| APP         | amyloid beta (A4) precursor protein (peptidase nexin-II, Alzheimer disease)       |
| SIRPA       | signal-regulatory protein alpha                                                   |
| ELA2        | elastase 2, neutrophil                                                            |
| LYZ         | lysozyme (renal amyloidosis)                                                      |
| GFNMB       | glycoprotein (transmembrane) nmb                                                  |
| NEU1        | sialidase 1 (lysosomal sialidase)                                                 |
| PRTN3       | proteinase 3 (serine proteinase, neutrophil, Wegener granulomatosis autoantigen)  |
| SRF         | serum response factor (c-fos serum response element-binding transcription factor) |
| RAB27A      | RAB27A, member RAS oncogene family                                                |
| SERPINB2    | serpin peptidase inhibitor, clade B (ovalbumin), member 2                         |
| ASAH1       | N-acylephingosine amidohydrolase (acid ceramidase) 1                              |
| SLC29A1     | solute carrier family 29 (nucleoside transporters), member 1                      |
| GAL         | galanin                                                                           |
| COL4A2      | collagen, type IV, alpha 2                                                        |
| CORO1A      | coronin, actin binding protein, 1A                                                |
| RAB31       | RAB31, member RAS oncogene family                                                 |
| MPO         | myeloperoxidase                                                                   |
| TMSB10      | thymosin, beta 10                                                                 |
| ZYX         | zyxin                                                                             |

**Supporting Figure S1** Gene Set Enrichment Analysis (GSEA) of leukaemic (ME-I, ME-L, MT-I) vs baseline (WT, FDCP-mix) sample-sets (Mootha et al., 2003; Subramanian et al., 2005). Three representative plots of curated gene-sets enriched with FDR <10% in the leukaemia-sample class and a list of their corresponding core enriched genes are depicted. GSEA was run at 1000 permutations and default settings were changed, owing to the low sample number and the log transformed expression data, to 'gene\_set' as permutation type and 'Diff\_of\_Classes' as metric for ranking. Enrichment for *WANG\_HOXA9\_VS\_MEIS1\_UP* (A), *ROSS\_MLL\_FUSION* (B) and *PARK\_RARALPHA\_MOD* (C) validated the 'leukaemic' cluster defined in our AML progression model.

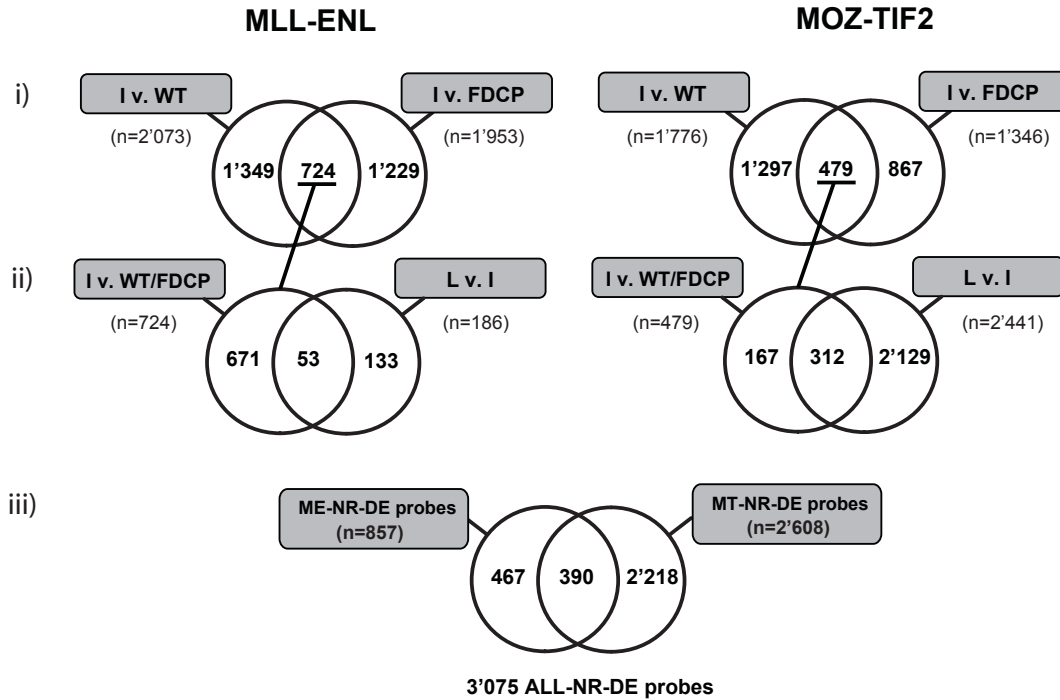

**Supporting Figure S2** Strategy for determination of non-redundant, differentially expressed probes (NR-DE probes). Differentially expressed probes, generated from a representative analysis of six pair-wise comparisons as outlined in Table S1 in Supporting Information S1, were further processed in three steps: i) Intersection between the two baseline controls WT and FDCP-mix provided 724 and 479 shared differentially expressed probes for MLL-ENL and MOZ-TIF2, respectively. ii) Those intersected probes were further used to define non-redundant differentially expressed probes for MLL-ENL (n = 857) or MOZ-TIF2 (n = 2'608), respectively (ME- and MT-NR-DE), considering unique probes at “baseline” and “progression” to frank leukaemia. iii) The final set of overall non-redundant, differentially expressed probes for both fusion proteins was defined by intersecting ME- and MT-NR-DE probes (n = 3'075, ALL-NR-DE probes).

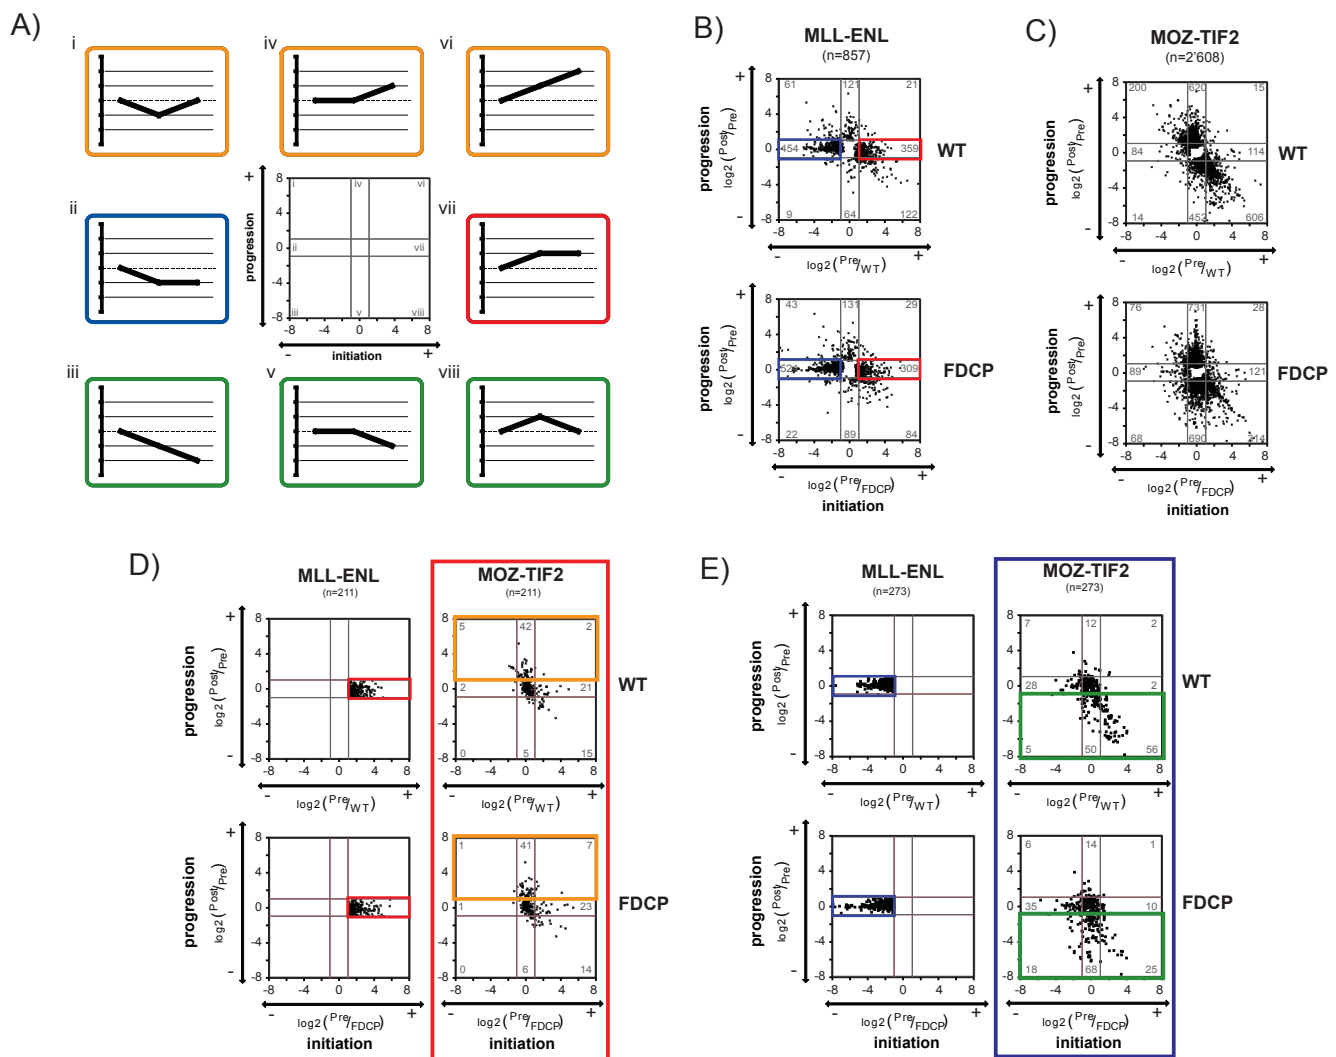

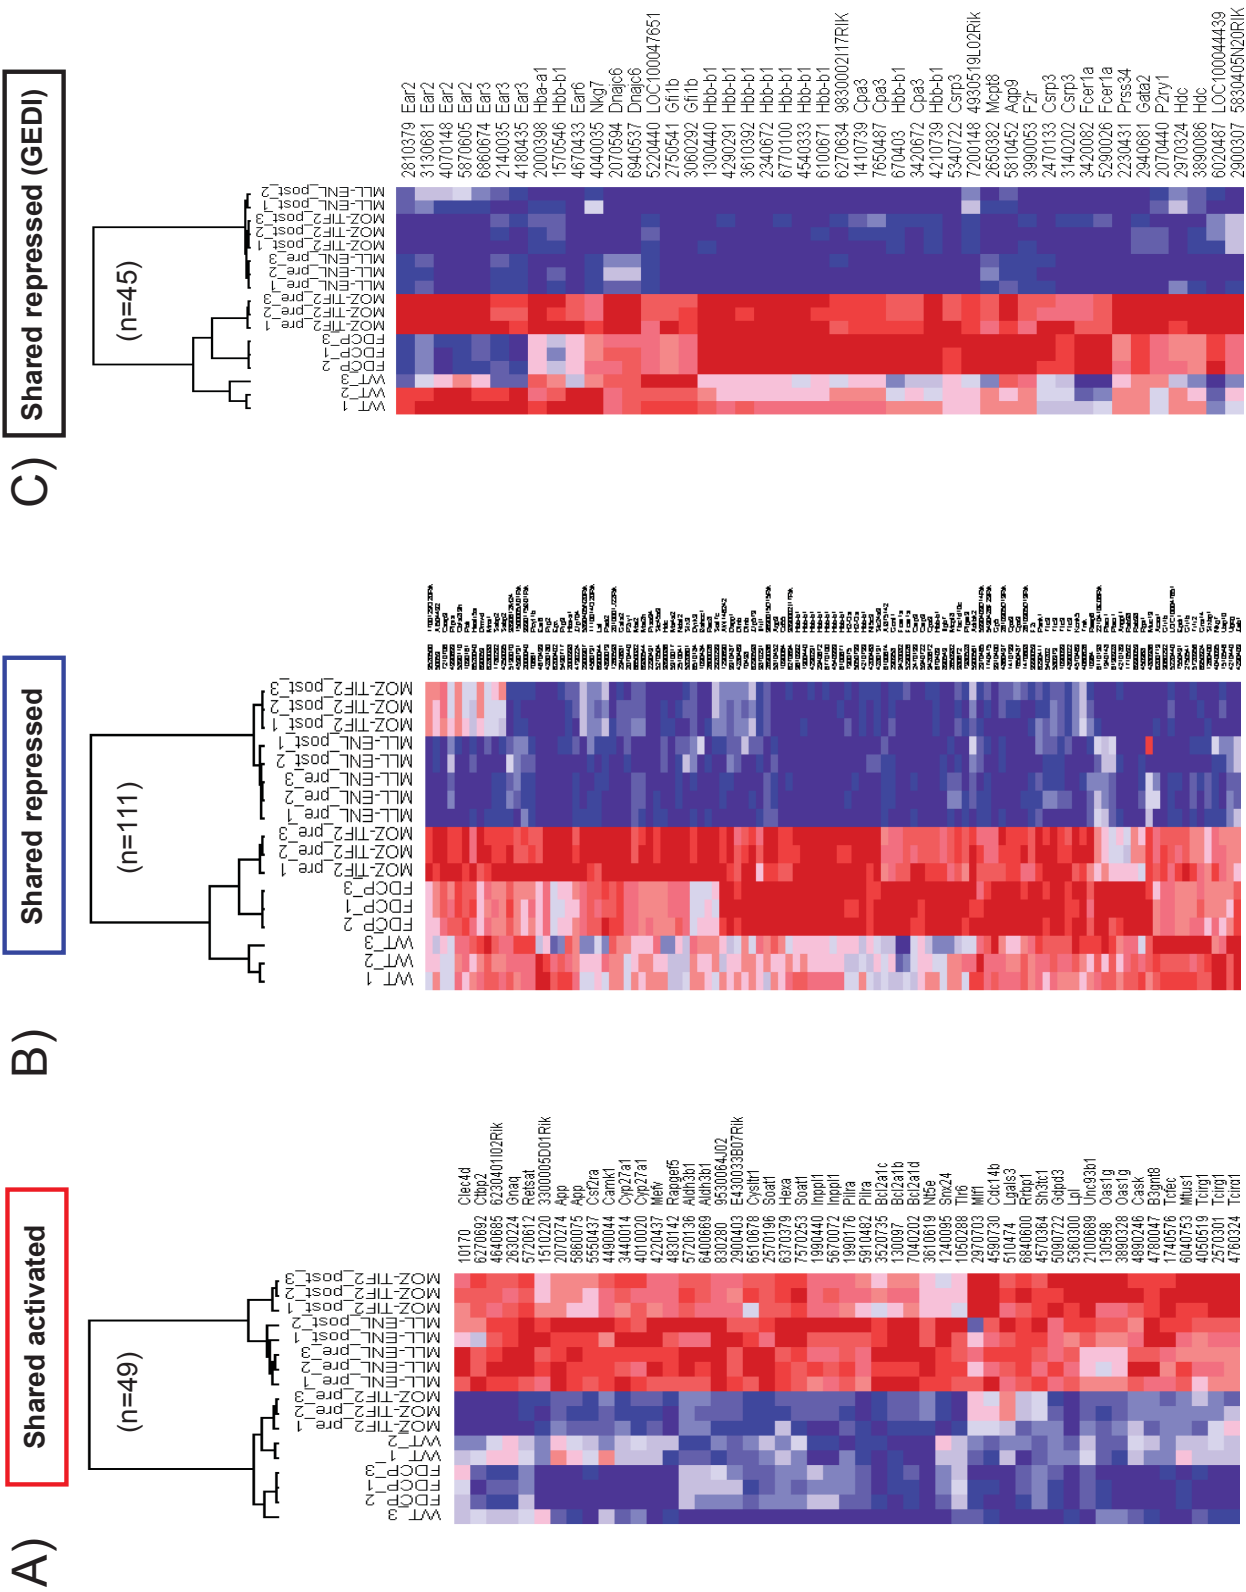

**Supporting Figure S4** Gene-expression profile of shared probes at leukaemic transition of MLL-ENL and MOZ-TIF2 induced AML. **A)** Hierarchical clustering and heat-map of the **49 shared activated probes** in MLL-ENL and MOZ-TIF2. The 49 probes were defined as outlined in Figure S3 in Supporting Information S1 and are derived from intersection of probes in the orange boxes of Figure S3D in Supporting Information S1. **B)** Hierarchical clustering and heat-map of the **111 shared repressed probes** in MLL-ENL and MOZ-TIF2. The 111 probes are derived from intersection of probes in the green boxes of Figure S3E in

Supporting Information S1. **C)** Hierarchical clustering and heat-map of the **45 shared repressed probes** localised in the area indicated by white arrowheads in GEDI maps from the “leukaemic” cluster (Figure 2B). Note that in all three sets of shared probes, the samples always segregate into the previously mentioned ‘non-leukaemic’ and ‘leukaemic’ cluster, with MT-I sample-sets assigned to the ‘non-leukaemic’ and ME-I to the ‘leukaemic’ cluster. A list of the genes from each set can be found in Table S2 in Supporting Information S1.



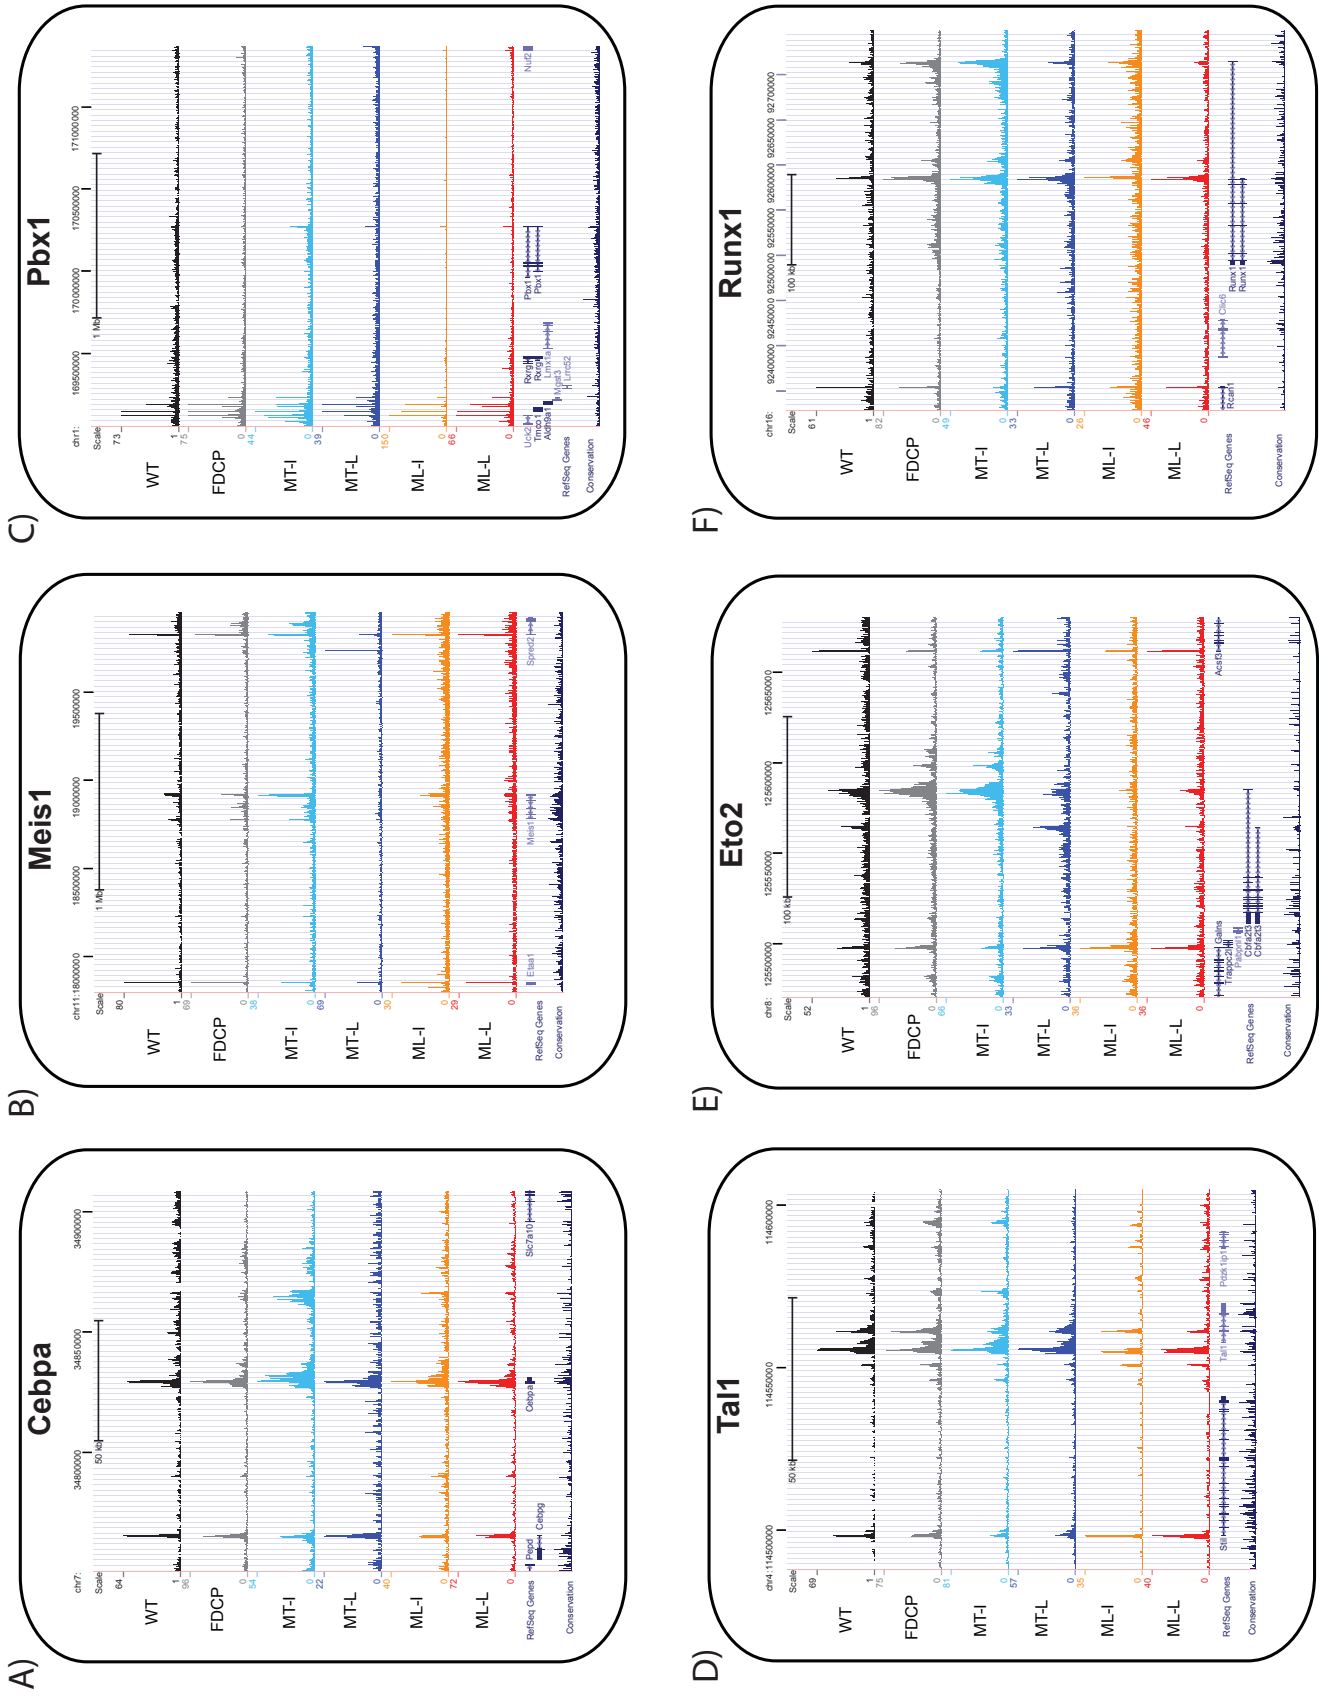

**Supporting Figure S6** Histone acetylation ChIP-Seq traces of HSPC-TFs from the repression cluster depicted in Figure 3A. Representative ChIP-Seq traces for each sample condition are shown for HSPC7 TFs with variable patterns (Cebpa, Meis1, Pbx1) or repressed in MLL-ENL only (Tail1, Eto2, Runx1). Note that Ets1 (with variable pattern) is displayed with Fli1 in Figure S5 in Supporting Information S1.

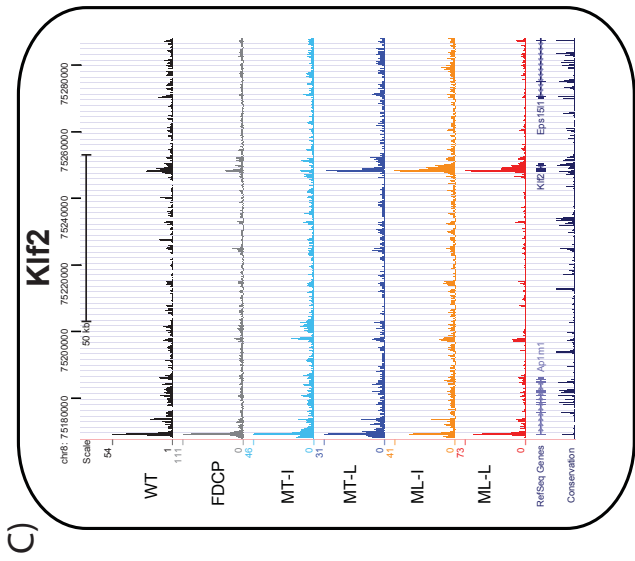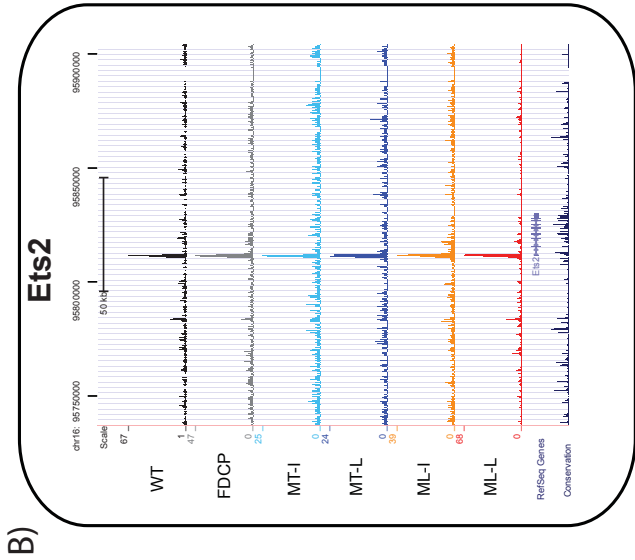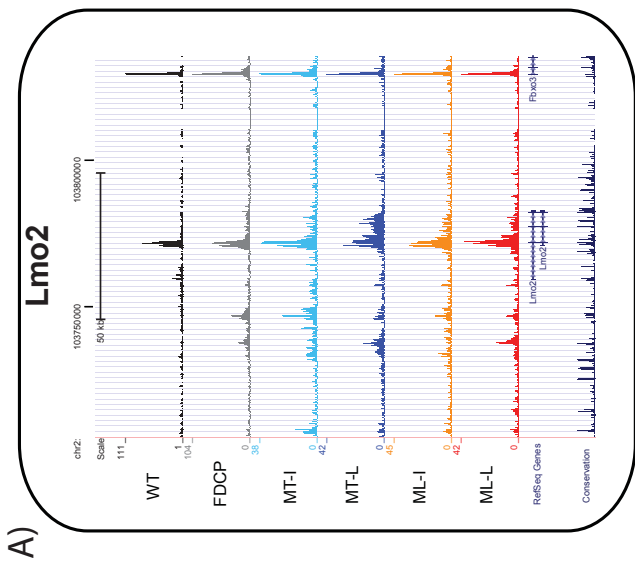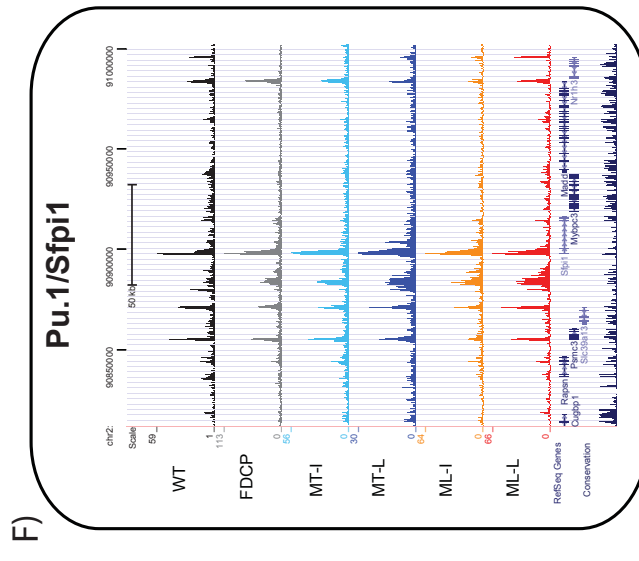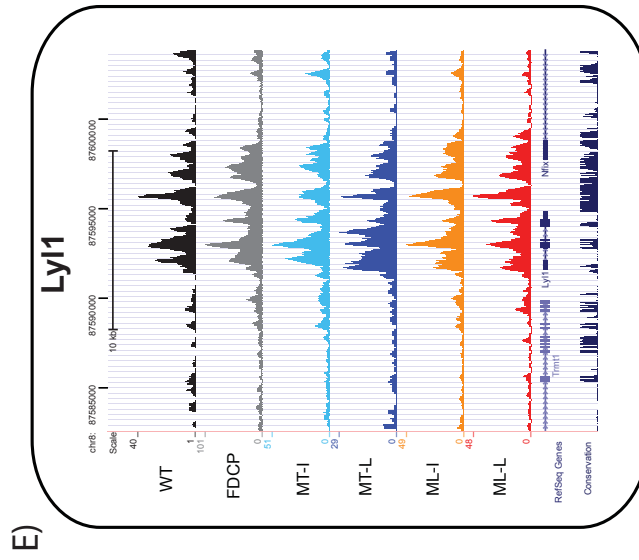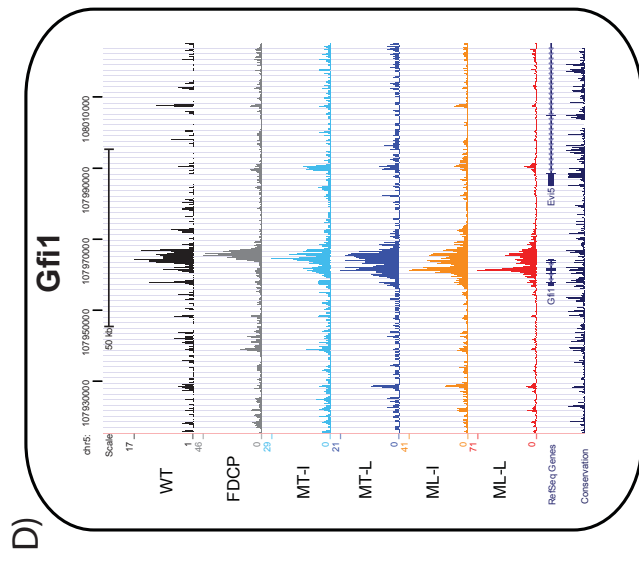

**Supporting Figure S7** Histone acetylation ChIP-Seq traces of HSPC-TFs from the activation cluster depicted in Figure 3A. Representative ChIP-Seq traces for each sample condition are shown for HSPCTFs Lmo2, Ets2, Klf2, Gfi1, Lyl1 and Pu1/Sfp1.

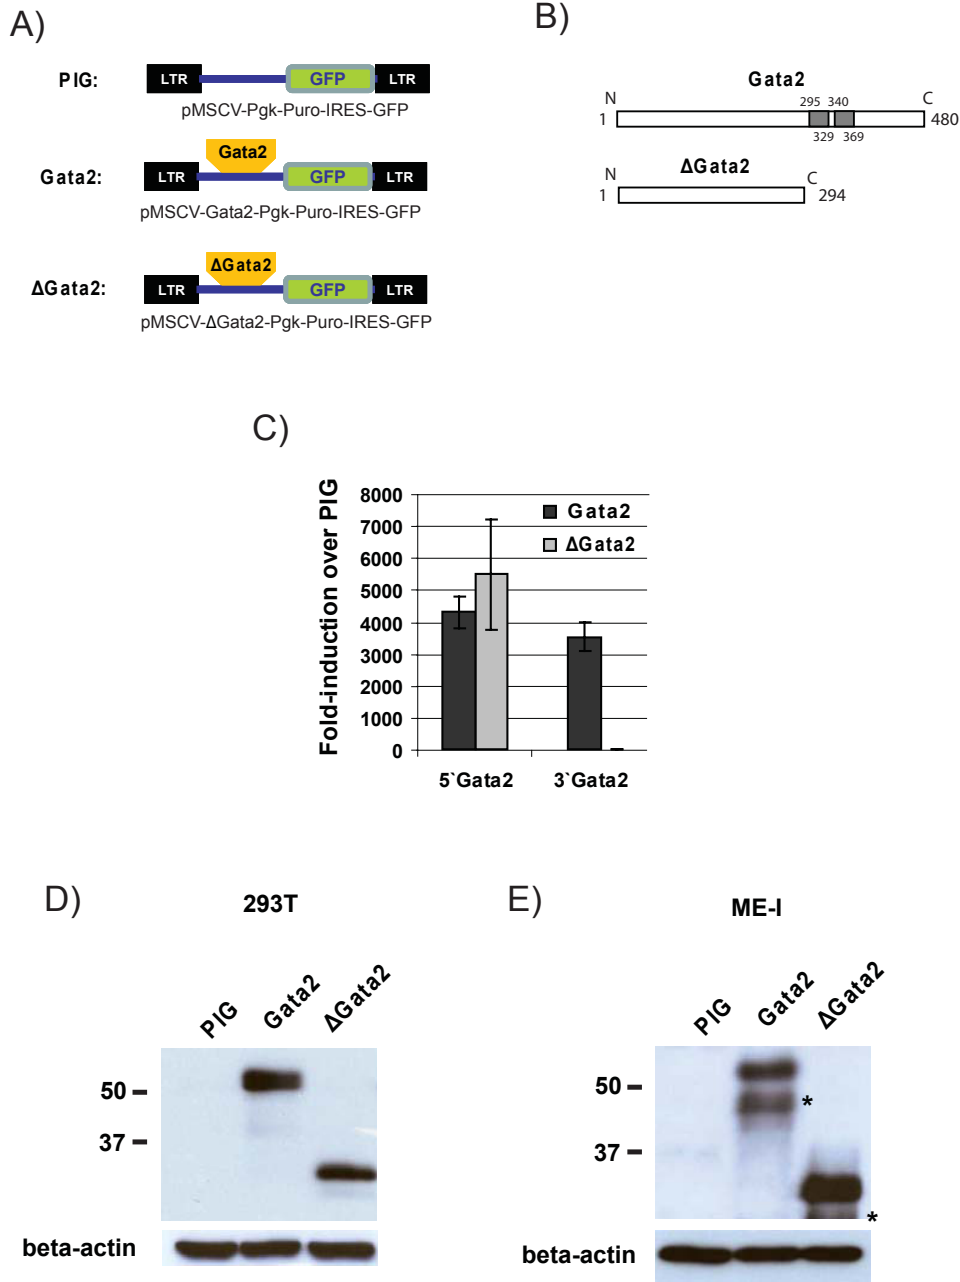

**Supporting Figure S8** Validation experiments of retroviral Gata2 constructs used for competitive proliferation assays. **A)** GFP vector constructs used for retroviral over-expression: cDNA of full length Gata2 and  $\Delta$ Gata2 were cloned with *BglIII/XhoI* into *pMSCV-Pgk-Puro-IRES-GFP* (PIG), generating *pMSCV-Gata2-Pgk-Puro-IRES-GFP* (Gata2) and *pMSCV- $\Delta$ Gata2-Pgk-Puro-IRES-GFP* ( $\Delta$ Gata2). **B)** Schema of Gata2 and  $\Delta$ Gata2 proteins. Full length Gata2 contains 480 amino-acids, with two zinc-finger domains at position 295–329 and 340–369, respectively (*InterProSignature*: IPR000679/PF00320).  $\Delta$ Gata2 is a 294 amino-acid long, N-terminal truncated protein, lacking the DNA-binding zinc-finger domains on the C-terminal region. **C)** QRT-PCR of ME-I cells sorted for GFP-positivity 36 hours after re-transduction with PIG, Gata2 and  $\Delta$ Gata2 GFP-expression vectors. 5' and 3' specific primers for Gata2 (5'Gata2 and 3'Gata2 with sequences available on request) were used to identify full length and deleted transcripts. X-axis depicts fold induction over PIG after normalization to

Hprt1 and bars represent SD of two independent experiments. **D)** Western blot of transiently transfected HET293T cells with PIG, Gata2 and  $\Delta$ Gata2 GFP-expression vectors, showing the presence of the correct full length and deleted Gata2 proteins. **E)** Western blot of Gata2 of retrovirally retransduced MLL-ENL-1 cells with PIG, Gata2 and  $\Delta$ Gata2 GFP-expression vectors, sorted for GFP-positivity 36 hours after transduction and showing the presence of the correct full length and truncated Gata2 proteins in retransduced ME-I. \* indicate potential degradation products of Gata2 and  $\Delta$ Gata2.



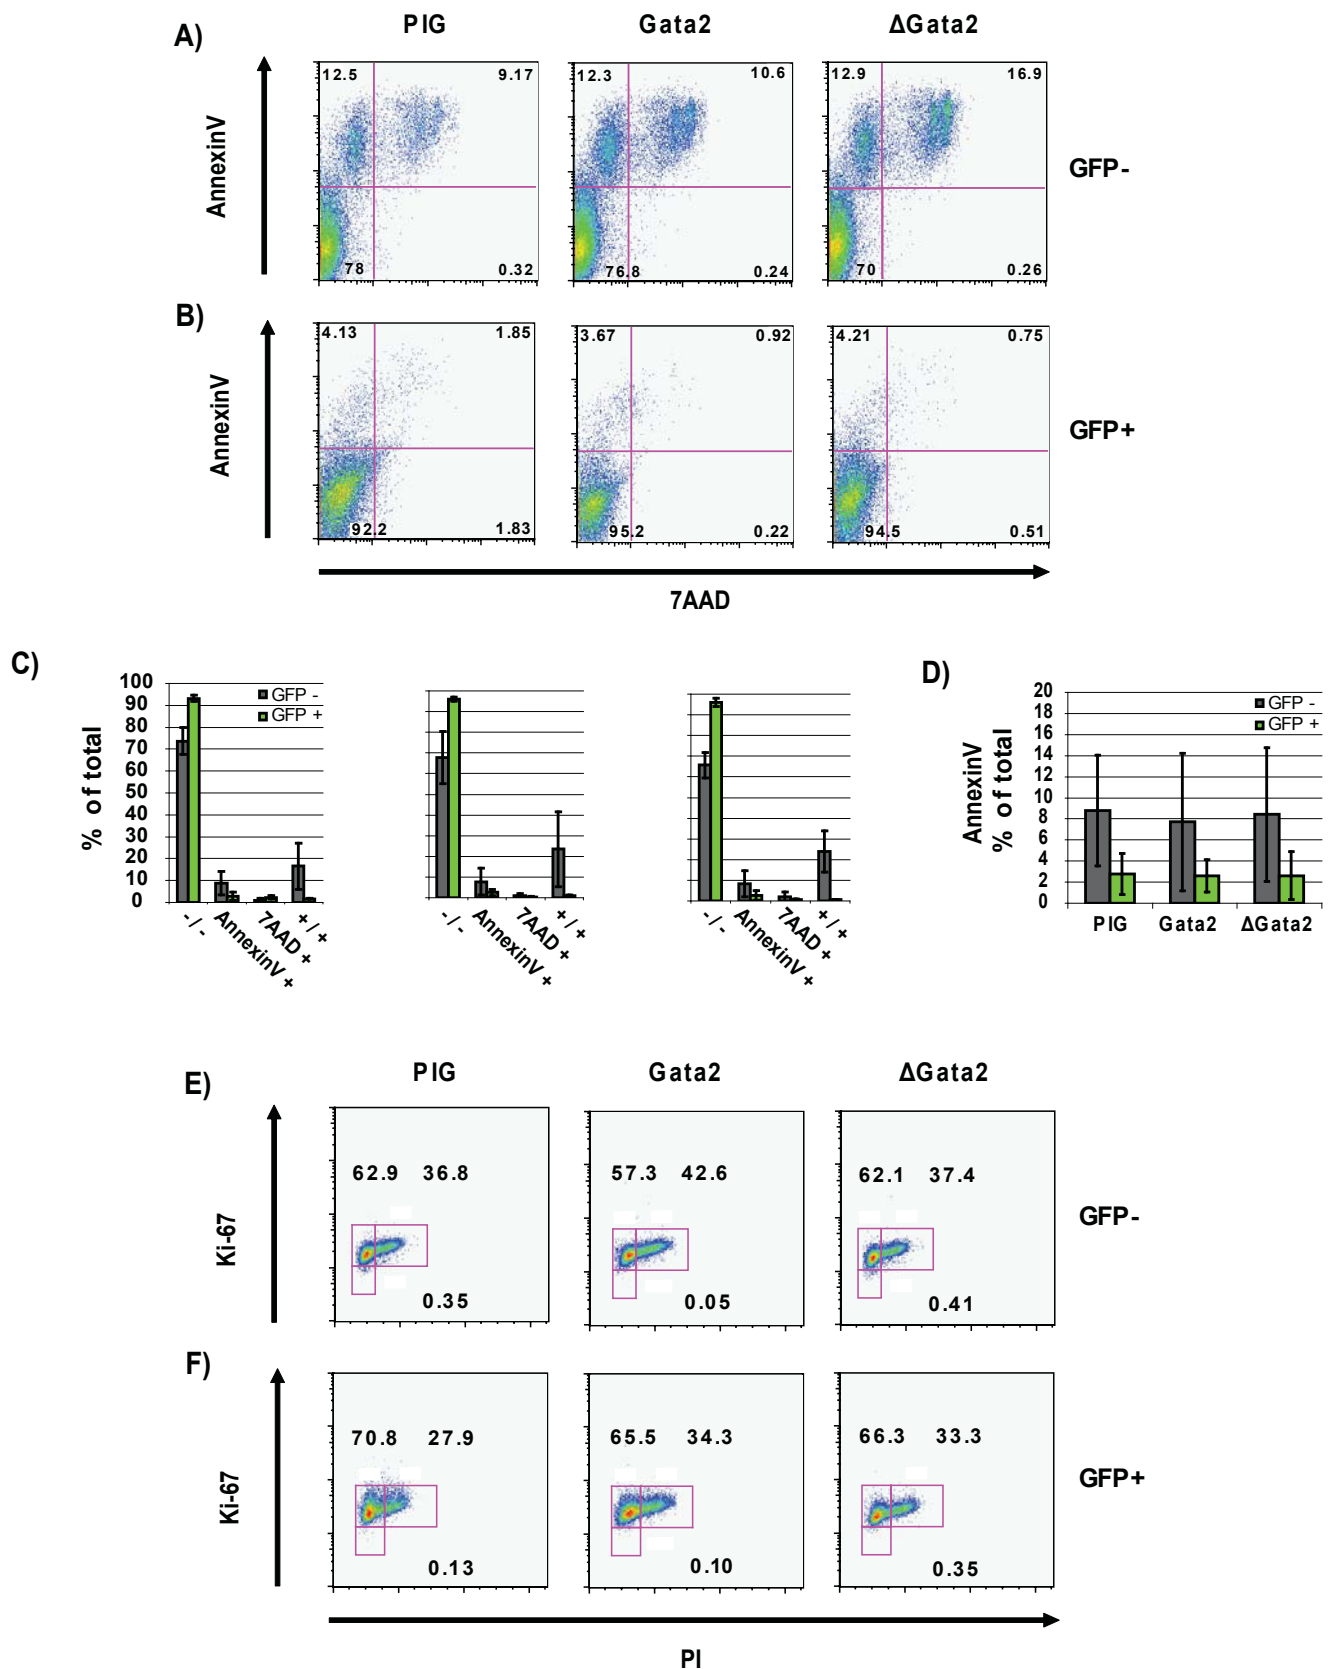

**Supporting Figure S9** AnnexinV and Ki-67 staining of ME-I cells transduced with PIG, Gata2 and  $\Delta$ Gata2 GFP expression vectors. **A)** AnnexinV staining 36 hours after infection for GFP-positive and GFP negative cells. Samples were run in parallel, without previous FACS-sorting. AnnexinV (Pacific Blue) and 7AAD fluorescence gated on GFP-negative cell-fraction. **B)** AnnexinV and 7AAD fluorescence gated on GFP-positive cell-fraction. **C)** Bar-charts summarizing the % of total number of GFP-positive and GFP-negative of gated cells for double negative (-/-), AnnexinV single positive (AnnexinV +), 7AAD single positive (7AAD +) and double positive (+/+) quadrants. Bars denote SD from two

independent experiments. **D)** Different representation of **C)** combining the AnnexinV values for PIG, Gata2 and  $\Delta$ Gata2 in one bar chart. **E)** Ki67 staining of ME-I cells re-transduced with PIG, Gata2 and  $\Delta$ Gata2 GFP expression vectors. FACS analysis was performed 36 hours after infection and after sorting for GFP-positive and GFP-negative cells. Ki-67 (FITC) and Propidium Iodide (PE) fluorescence for GFP-negative cells. **F)** Ki-67 (FITC) and Propidium Iodide (PE) fluorescence for GFP positive cells.

**A**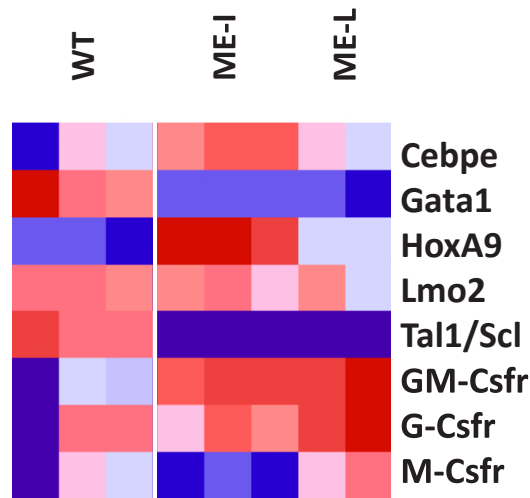**B**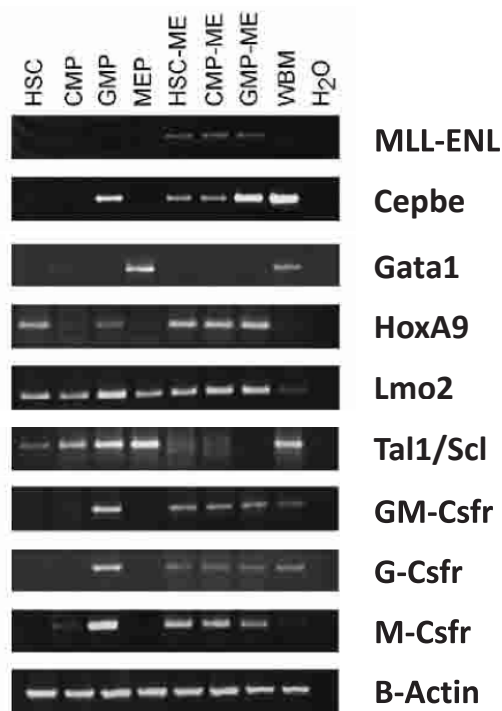

(adapted from A. Cozzio et al;  
Genes Dev. 2003 17(24):3029-35)

**Supporting Figure S10** **A)** Heatmap of selected HSPC TF and phenotype defining genes in WT, ME-I and ME-L. **B)** Gene expression analysis comparing HSC and myeloid progenitors (CMP, GMP and MEP) to their MLL-ENL transduced leukaemic counterparts adapted from Cozzio et al (Cozzio, Passegue, Ayton, Karsunky, Cleary and Weissman 2003). The WT sample (Lin/c-kit+) used in our progression model contains a mixture of HSC, CMP, GMP cells. The expression profiles for HSPC-TF, such as *Cebpe*, *Gata1*, *Hoxa9*, *Tal1/Scl* and *Lmo2*, and the phenotypic markers, such as *GM-Csfr*, *G-Csfr* and *M-Csfr*, confirm the similarity of our transduced cells and the validity of our WT control.

**Bonadies et al, Suppl. Figure 10**

## A) Output from oPOSSUM

[FAQ](#) | [Help](#) | [About](#) | [News](#) | [Contact](#)

[oPOSSUM](#)

[Human SSA](#)

[Human CSA](#)

[Worm SSA](#)

[Yeast SSA](#)

[oPOSSUM Main](#) | [Home](#) | [Custom Analysis](#) | [Download API](#) | [Download DB](#)

### Human Single Site Analysis

Version 2.0

#### Analysis Results

##### Selected Parameters

Conservation level: Top 10% of conserved regions (min. conservation 70%)  
Matrix match score: 80%  
Upstream sequence length: 5000  
Downstream sequence length: 5000  
Number of genes submitted: 75  
Number of genes included: 55  
Number of genes excluded: 20

##### Target Genes

[Analyzed:](#) Piger3 Dapp1 Adrbk2 Rgs1 Aqp9 Nkg7 Usp10 Ptprs Peys1b Trfr2 Poli Pad2 Il1r1 Rab38 Reep6 Nt5c3 Epx Casp9 Cbfa2t3h Stxbp1 Csrp3 Itgb7 Dtnb Mns1 Dyrk3 Msi2 Ugcg Ms4a2 Acss1 Angpt1 Prg3 Pank1 Tnik Gna14 Slc45a3 Stx3 Ndst2 Cpa3 Gf1b  
Kenk5 P2ry1 Muc13 Bahce1 Tbc1d10c Fcer1a Prg2 Gp5 Gent1 F2r Ttc3 Gata2 Slc24a3 Dmwd AW146242 H2-Oa  
[Excluded:](#) AI504432 AI875142 Cd55 Ear6 Epdrl Hba-a1 Hbb-b1 Hdc Heatr5a Lat Mcpt8 Msi2h Plscr1 Prss34 Rec8 Siat7c Ssbp2 Zeb1 Zfp579 Zfp704

##### oPOSSUM Analysis

| TF                        | TF Class         | TF Supergroup | IC     | Background gene hits | Background gene non-hits | Target gene hits | Target gene non-hits | Background TFBS hits | Background TFBS rate | Target TFBS hits | Target TFBS rate | Z-score | Fisher score |
|---------------------------|------------------|---------------|--------|----------------------|--------------------------|------------------|----------------------|----------------------|----------------------|------------------|------------------|---------|--------------|
| <a href="#">NF-kappaB</a> | REL              | vertebrate    | 13.345 | 5960                 | 9190                     | 30               | 25                   | 11447                | 0.0050               | 62               | 0.0076           | 10.7    | 1.608e-02    |
| <a href="#">MZF1_L1</a>   | ZN-FINGER, C2H2  | vertebrate    | 8.586  | 13090                | 2060                     | 54               | 1                    | 160814               | 0.0419               | 651              | 0.0479           | 8.632   | 3.155e-03    |
| <a href="#">Cebpa</a>     | bZIP             | vertebrate    | 9.187  | 8322                 | 6828                     | 40               | 15                   | 23857                | 0.0124               | 106              | 0.0156           | 8.196   | 5.239e-03    |
| <a href="#">HNF4A</a>     | NUCLEAR RECEPTOR | vertebrate    | 9.617  | 5541                 | 9609                     | 25               | 30                   | 9566                 | 0.0054               | 46               | 0.0073           | 7.543   | 1.113e-01    |
| <a href="#">IRF2</a>      | TRP-CLUSTER      | vertebrate    | 21.134 | 643                  | 14507                    | 5                | 50                   | 709                  | 0.0006               | 5                | 0.0011           | 6.607   | 8.422e-02    |
| <a href="#">Myb</a>       | TRP-CLUSTER      | vertebrate    | 9.883  | 10043                | 5107                     | 46               | 9                    | 36934                | 0.0128               | 157              | 0.0154           | 6.56    | 3.428e-03    |
| <a href="#">REL</a>       | REL              | vertebrate    | 10.515 | 7798                 | 7352                     | 33               | 22                   | 18677                | 0.0081               | 82               | 0.0101           | 6.214   | 1.295e-01    |
| <a href="#">Ar</a>        | NUCLEAR RECEPTOR | vertebrate    | 15.703 | 585                  | 14565                    | 3                | 52                   | 619                  | 0.0006               | 4                | 0.0011           | 5.671   | 3.583e-01    |
| <a href="#">NFKB1</a>     | REL              | vertebrate    | 15.627 | 2832                 | 12318                    | 17               | 38                   | 4140                 | 0.0020               | 21               | 0.0028           | 5.479   | 2.036e-02    |
| <a href="#">STAT1</a>     | Stat             | vertebrate    | 18.431 | 2165                 | 12985                    | 9                | 46                   | 2693                 | 0.0016               | 14               | 0.0024           | 5.39    | 3.866e-01    |

[Download as a tab delimited text file](#) (results will be kept on the server for 3 days after analysis)

[Back to top](#)

Consult the [help file](#) for an explanation of the column headings. To perform another analysis, please use the **Back** button on your browser or click the **Main** or **Custom Analysis** link at the top of the page to return to the **Select Analysis Parameters** form.

## B)

Results from WebMOTIFS job aml (de novo MD)

Page 1 of 1

Motif discovery was run on [these sequences](#).

You requested motif discovery with AlignACE.

AlignACE discovered 341 motifs: [Raw Program Output](#) [Motifs in TAMO text format](#)

You requested motif discovery with MDscan.

MDscan discovered 25 motifs: [Raw Program Output](#) [Motifs in TAMO text format](#)

You requested motif discovery with Weeder.

Weeder discovered 4 motifs: [Raw Program Output](#) [Motifs in TAMO text format](#)

You requested motif discovery with MEME.

MEME discovered 6 motifs: [Raw Program Output](#) [Motifs in TAMO text format](#)

376 of these motifs were discarded as insignificant

No significant motifs found

Please note that this page will remain up for the next 30 days and then will be removed from our server. You can download the entire webpage (including all logos and intermediate output): [wholepage.tar.gz](#).

**Supporting Figure S11** Inference of transcriptional regulators from gene expression data alone using the shared repressed gene set from Table S2 in Supporting Information S1. A) The oPOSSUM tool identified 10 candidate overrepresented motifs but none correlated with differentially expressed HSPC TFs. B) The WebMOTIFS tool failed to identify any significant motifs.

*Bonadies et al, Suppl. Figure 11*

**Supporting Table S1: Summary of differentially expressed probes.**

| Pair-wise comparisons | Not intersected  |                           |                           | Intersected      |                 |                   |
|-----------------------|------------------|---------------------------|---------------------------|------------------|-----------------|-------------------|
|                       | Total (% of all) | Up (% of total)           | Down (% of total)         | Total (% of all) | Up (% of total) | Down (% of total) |
| <i>A) MLL-ENL</i>     |                  |                           |                           |                  |                 |                   |
| 1a. I v. WT           | 2073 (10%)       | 980 (47.3%) *             | 1093 (52.7%) *            | 724 (3.5%)       | 342 (47.2%)     | 382 (52.8%)       |
| 1b. I v. FDCP-mix     | 1953 (9.4%)      | 780 (39.9%) ***           | 1173 (60.1%) ***          |                  |                 |                   |
| 2. L v. I             | 186 (0.9%)       | 107 (57.5%) *             | 79 (42.5%) *              |                  |                 |                   |
|                       |                  |                           |                           |                  |                 |                   |
| <i>B) MOZ-TIF2</i>    |                  |                           |                           |                  |                 |                   |
| 1a. I v. WT           | 1776 (8.6%)      | 1019 (57.4%) ***          | 757 (42.6%) ***           | 479 (2.3%)       | 338 (70.6%)     | 141 (29.4%)       |
| 1b. I v. FDCP-mix     | 1346 (6.5%)      | 674 (50.1%) <sup>ns</sup> | 672 (49.9%) <sup>ns</sup> |                  |                 |                   |
| 2. L v. I             | 2441 (11.8%)     | 1109 (45.4%) ***          | 1332 (54.6%) ***          |                  |                 |                   |

**Supporting Table S1** Summary of differentially expressed probes for six representative pair-wise comparisons using the MLL-ENL and MOZ-TIF2 mouse models. Numbers of differentially expressed probes at “initiation” (I) are shown for the two baseline samples WT (1a.) and FDCP-mix (1b.) and at “progression” to frank leukaemia (L) (2.). The ‘Not intersected’ columns show total numbers in each of the six comparisons, as well as the corresponding numbers for up- and downregulated probes, respectively. Chi-Square Test was applied to test for significant changes between the up- and down-regulated probes: ns non significant, \* <0.01, \*\* <0.001, \*\*\* <0.0001. Differentially expressed probes in WT and FDCP-mix were intersected to correct for *in-vitro* culturing artefacts and number of total, up- or down-regulated probes are shown in the ‘Intersected’ columns.
